# Supplementary figures and images for: Identification of Serine 119 as an Effective Inhibitor Binding Site of M. tuberculosis Ubiquitin-like Protein Ligase PafA Using Purified Proteins and M. smegmatis
Source: PubMed Central journal article supplement — eBioMedicine. 2018 Mar 27;30:225–36. doi: 10.1016/j.ebiom.2018.03.025 (PMC5952411; doi:10.1016/j.ebiom.2018.03.025), 2018-03-27

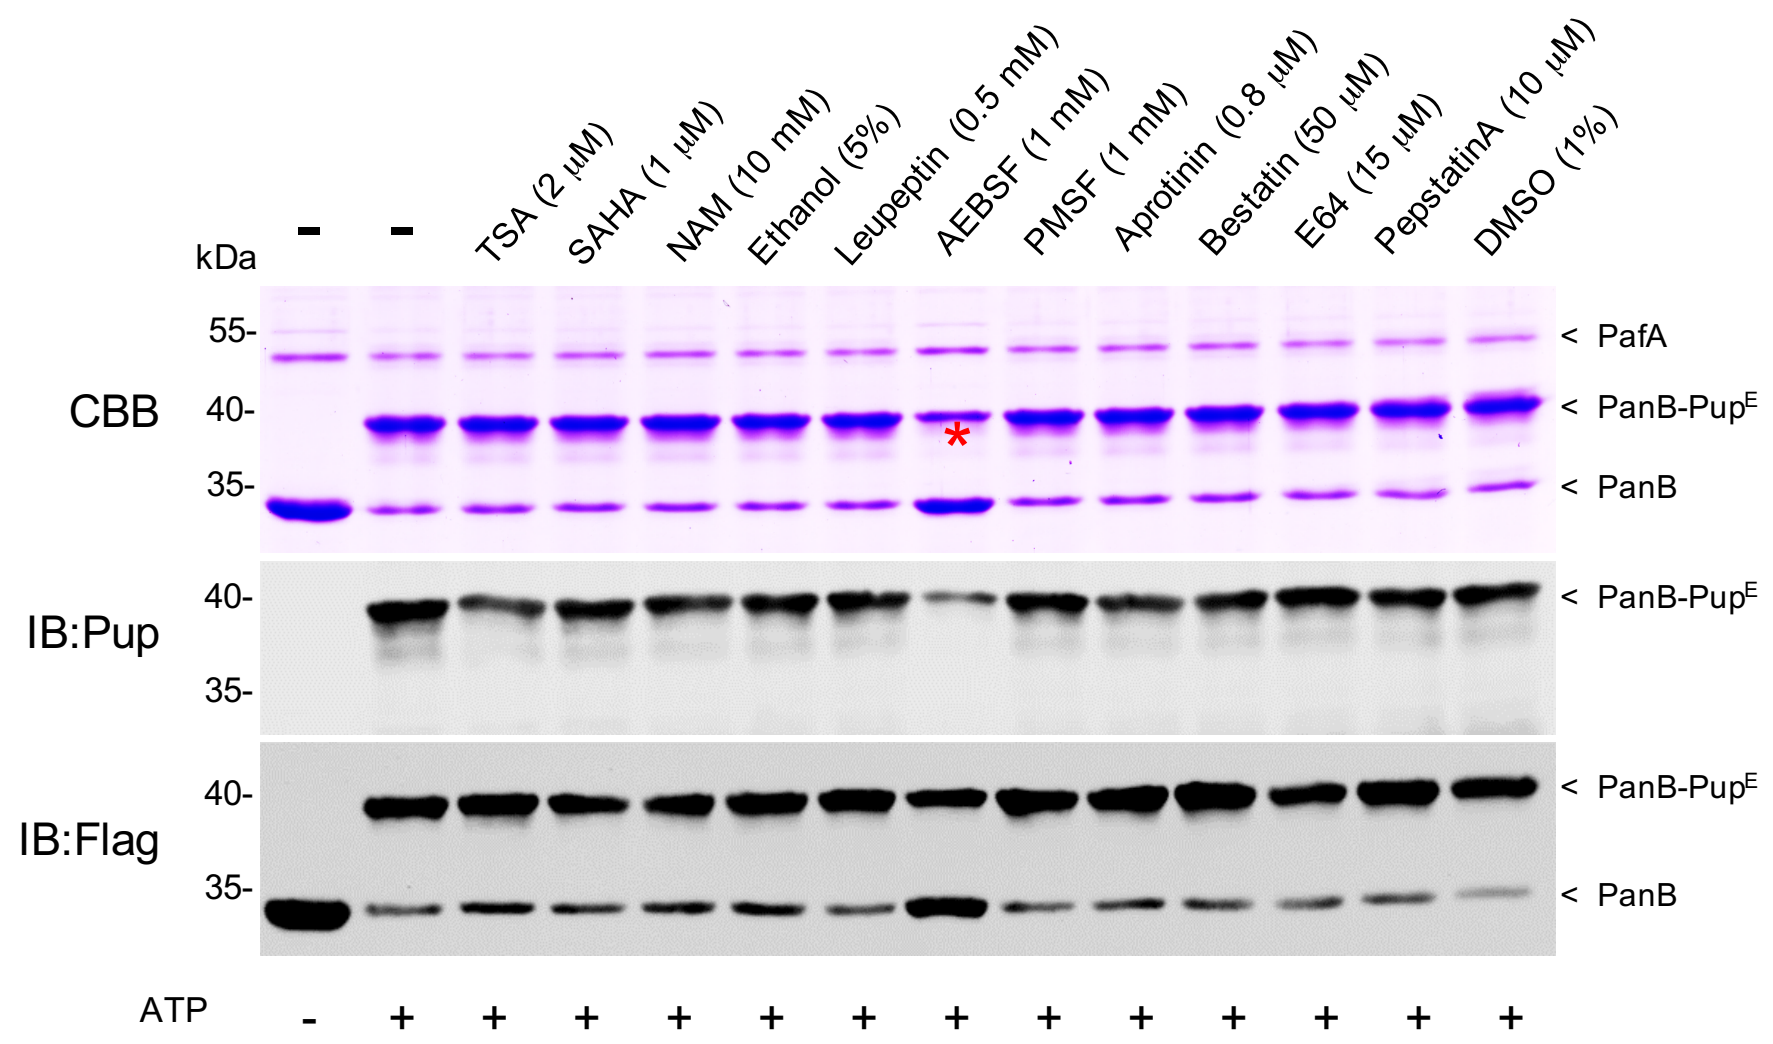

**Figure S1**

Supplement: mmc3.pdf [file mmc3.pdf]

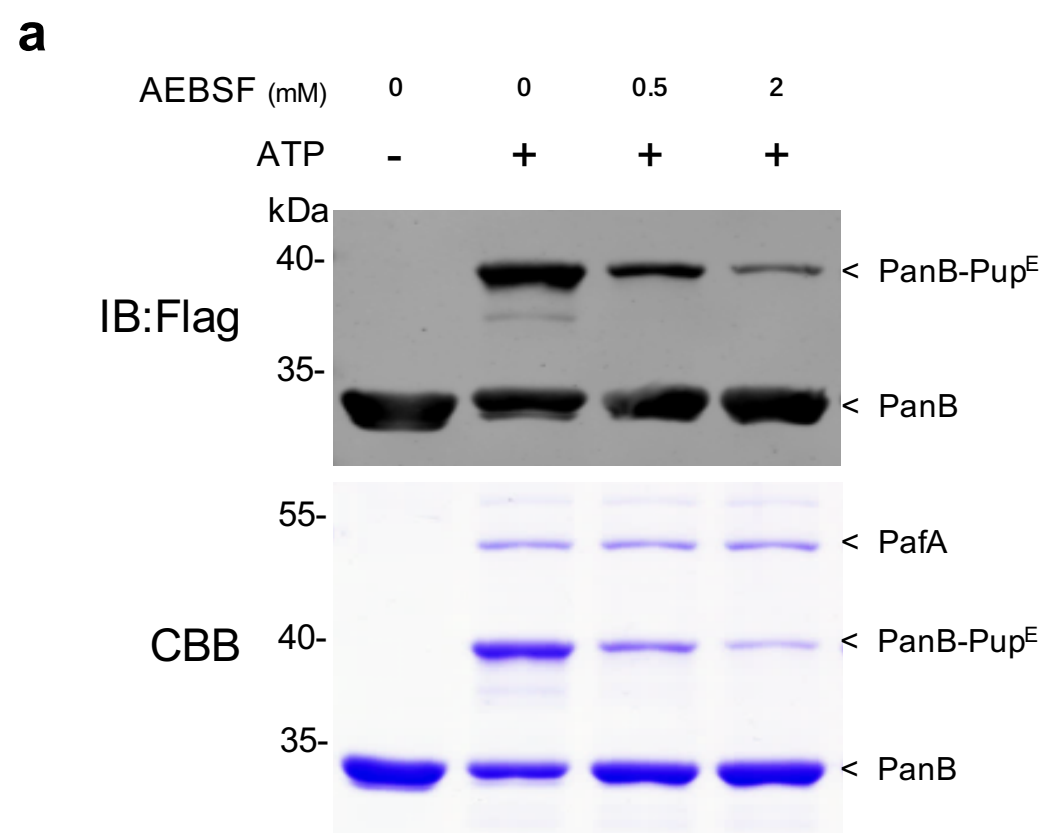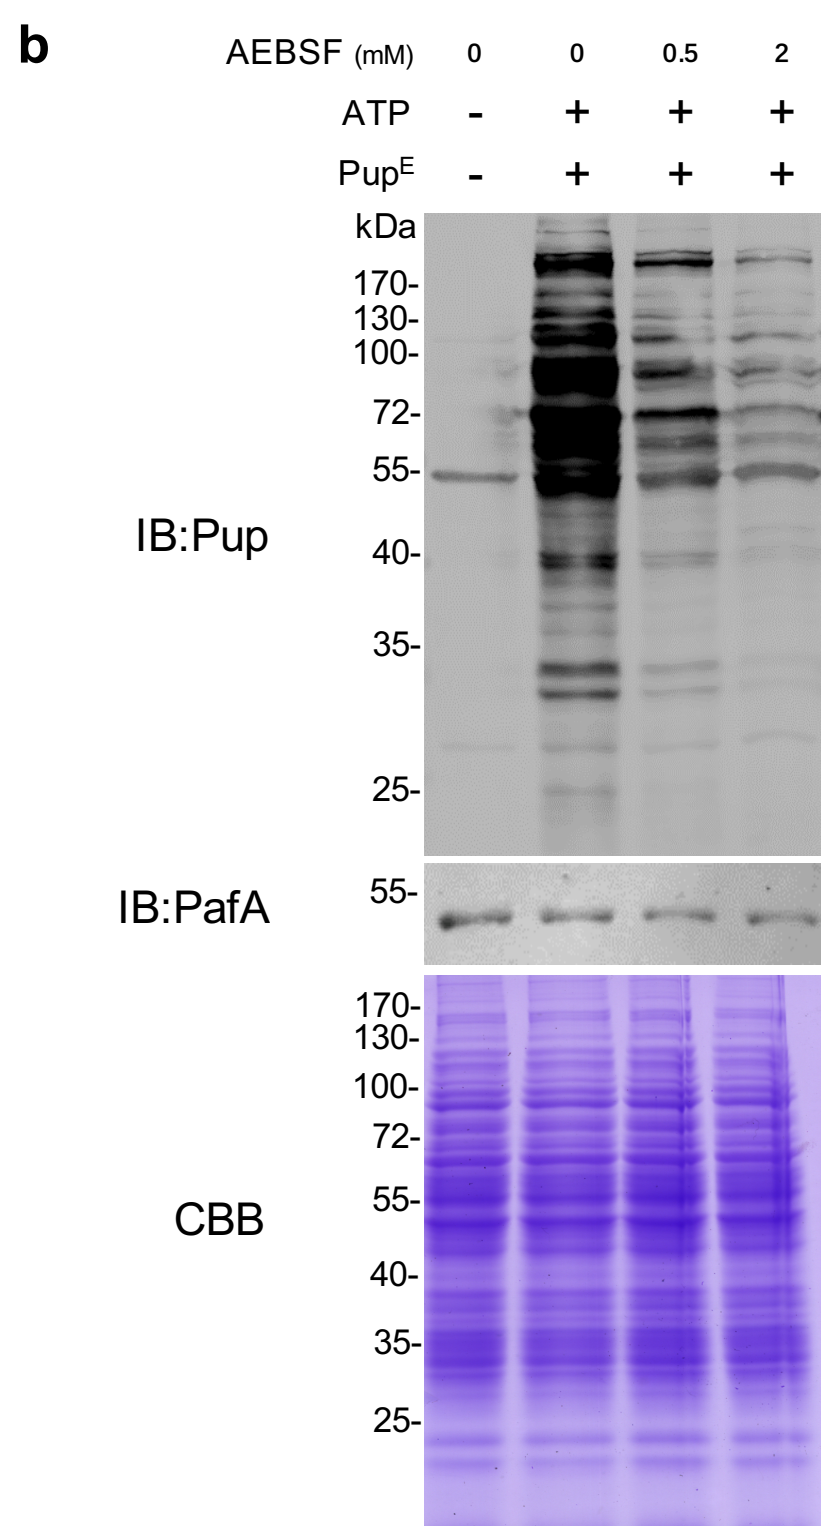

**Figure S2**

Supplement: mmc4.pdf [file mmc4.pdf]

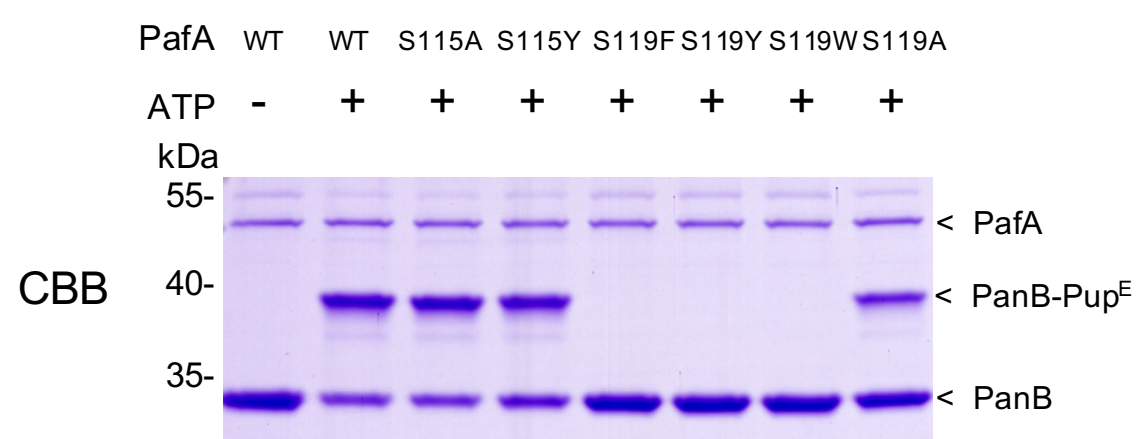

**Figure S3**

Supplement: mmc5.pdf [file mmc5.pdf]

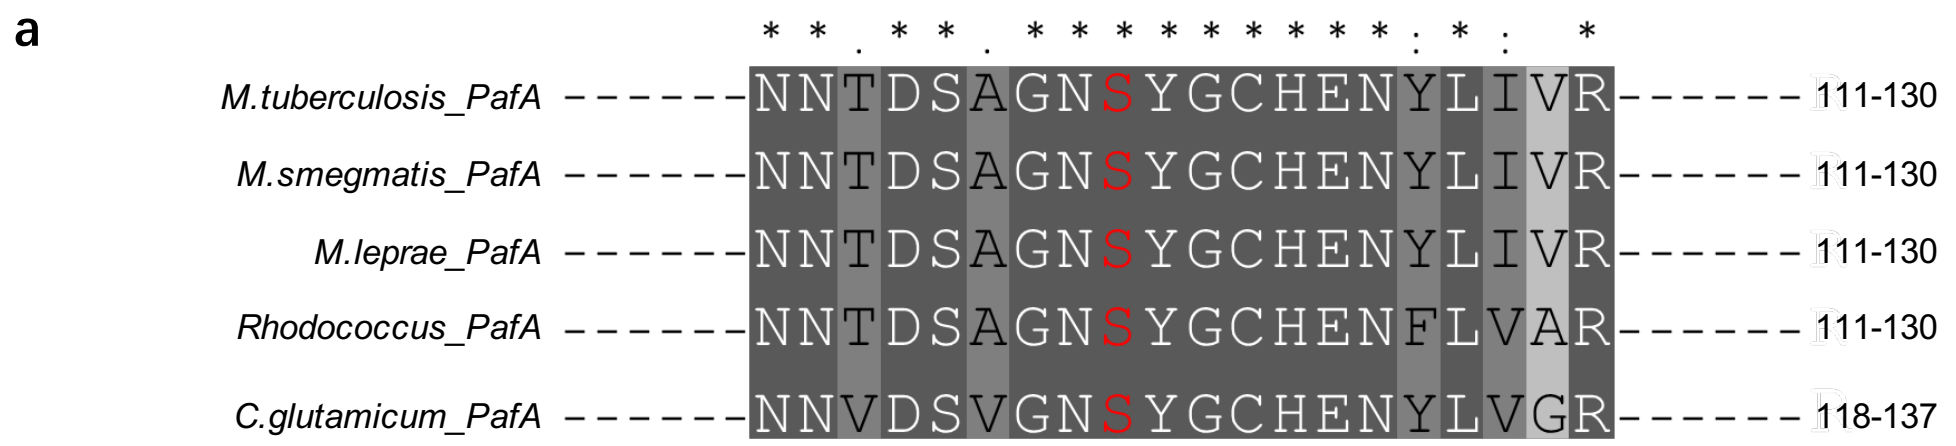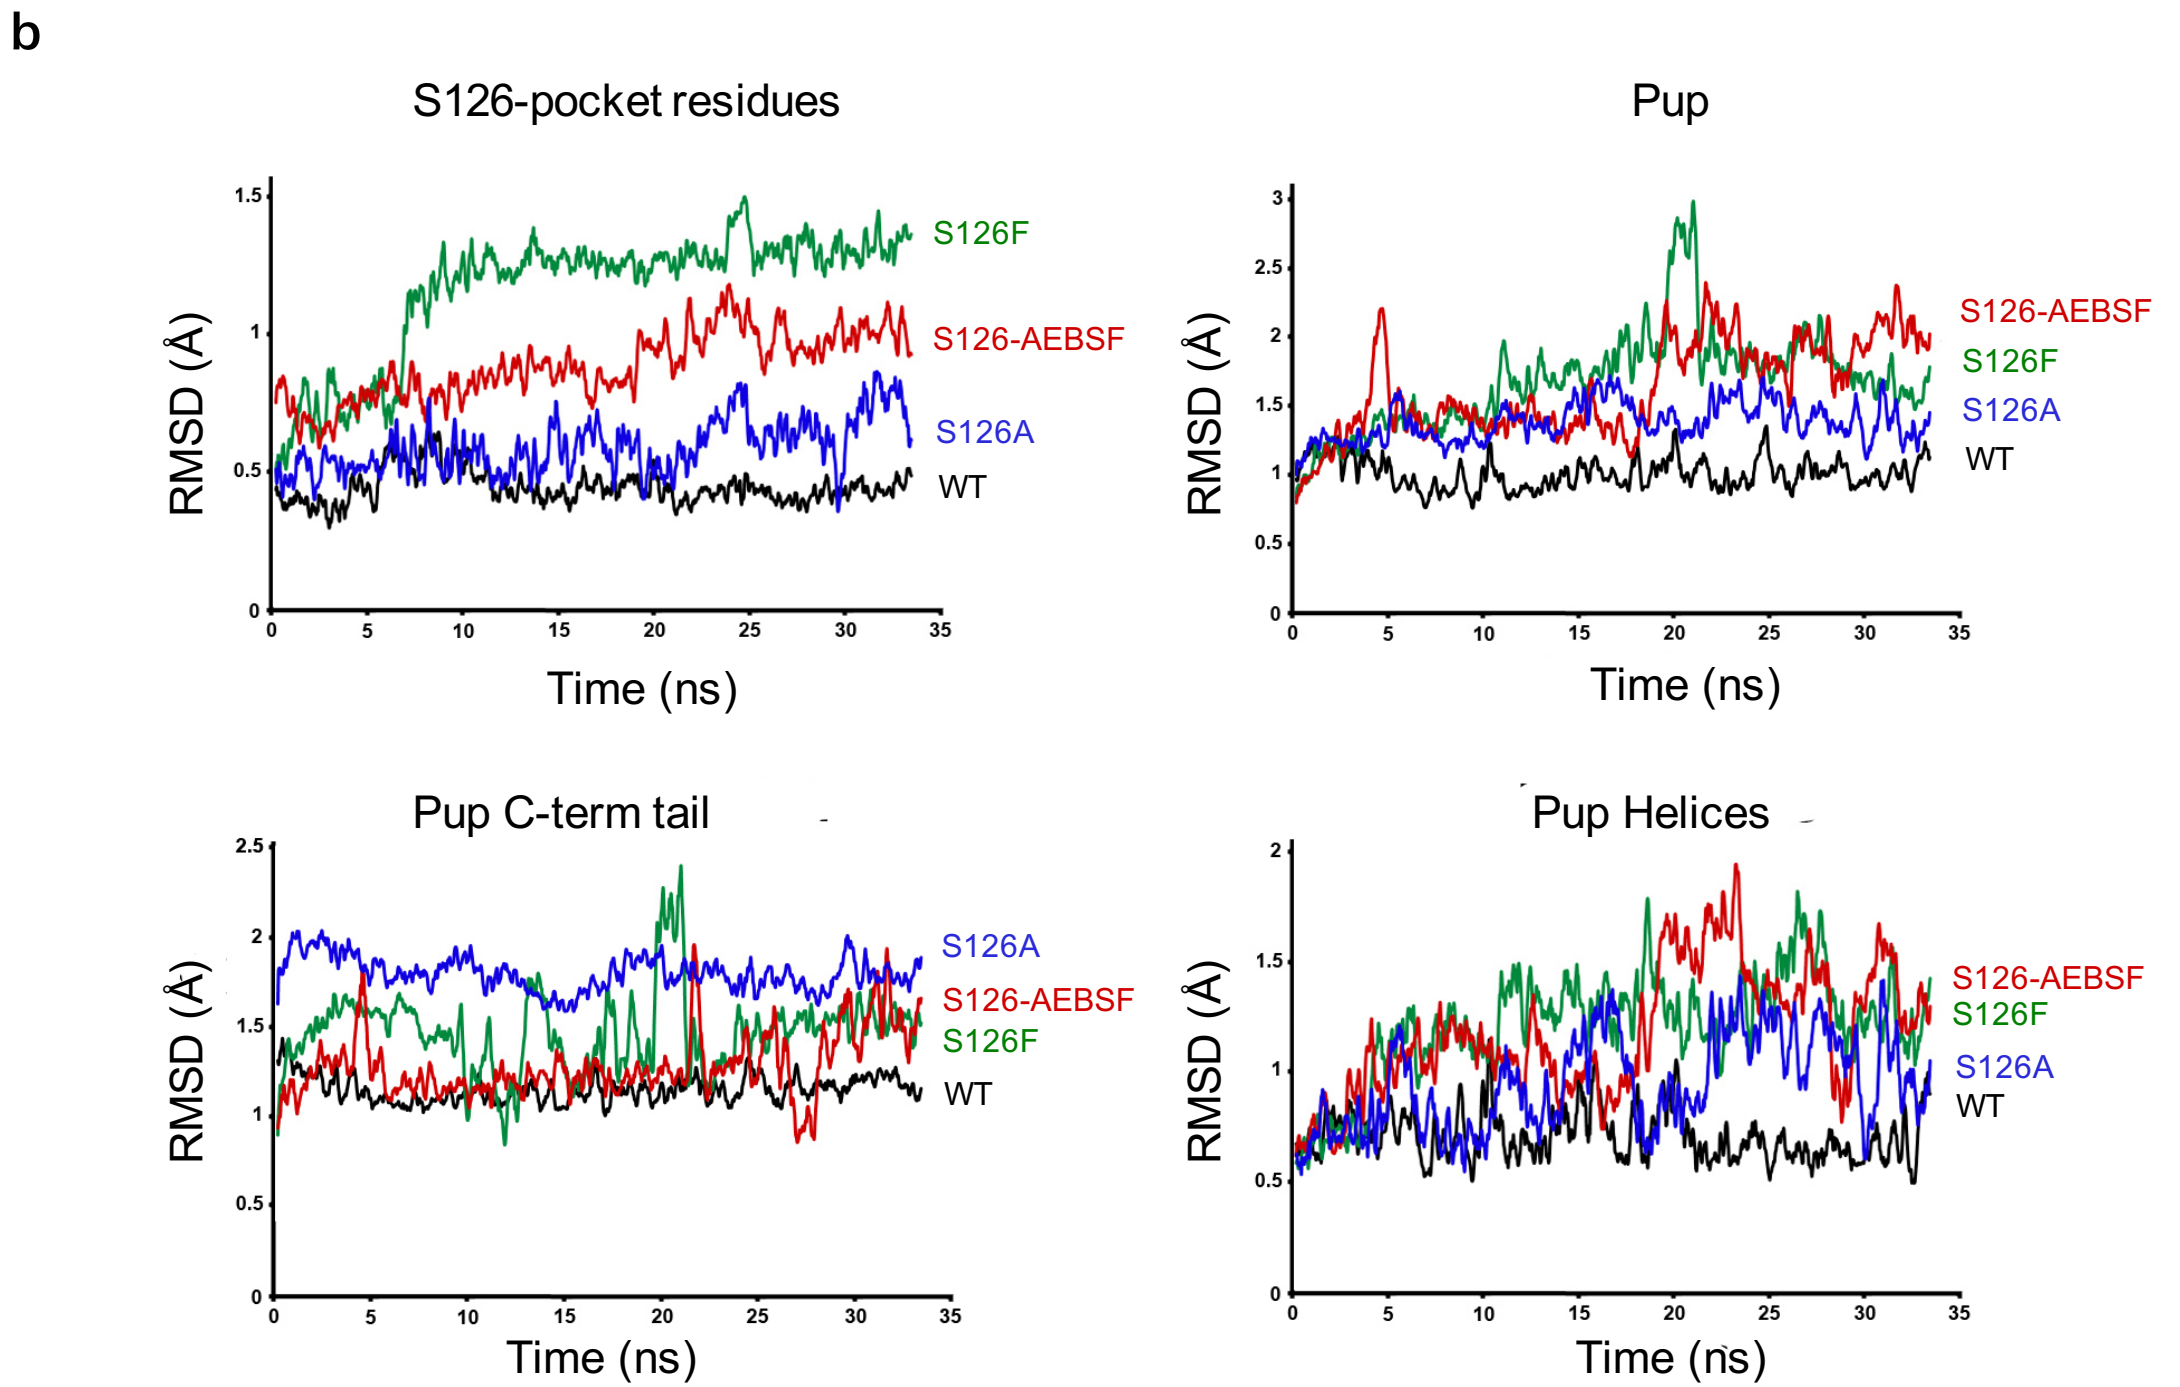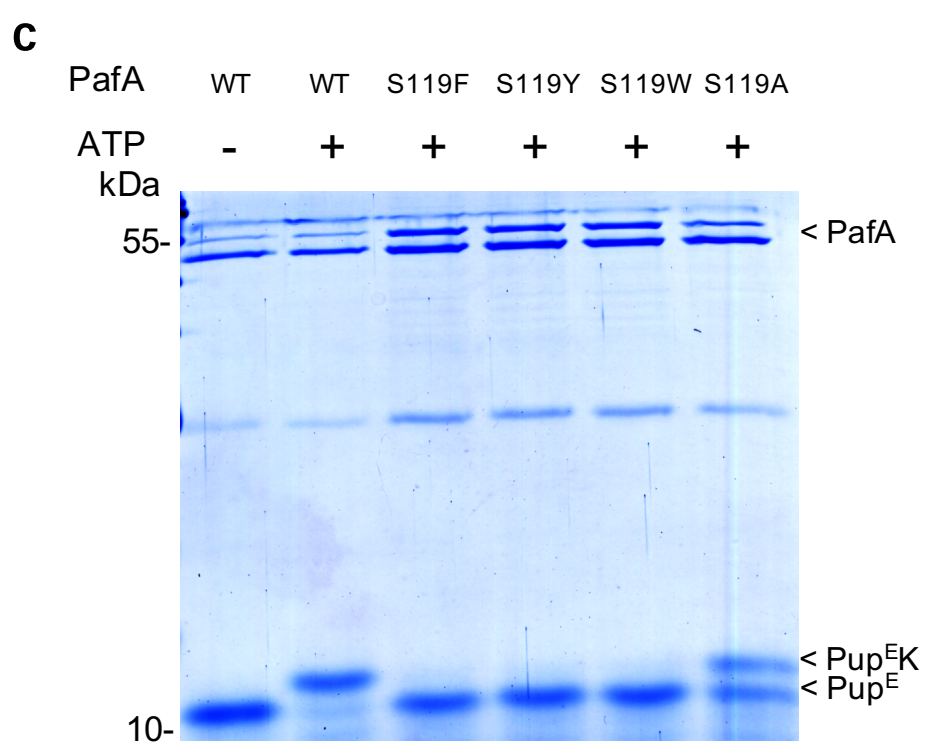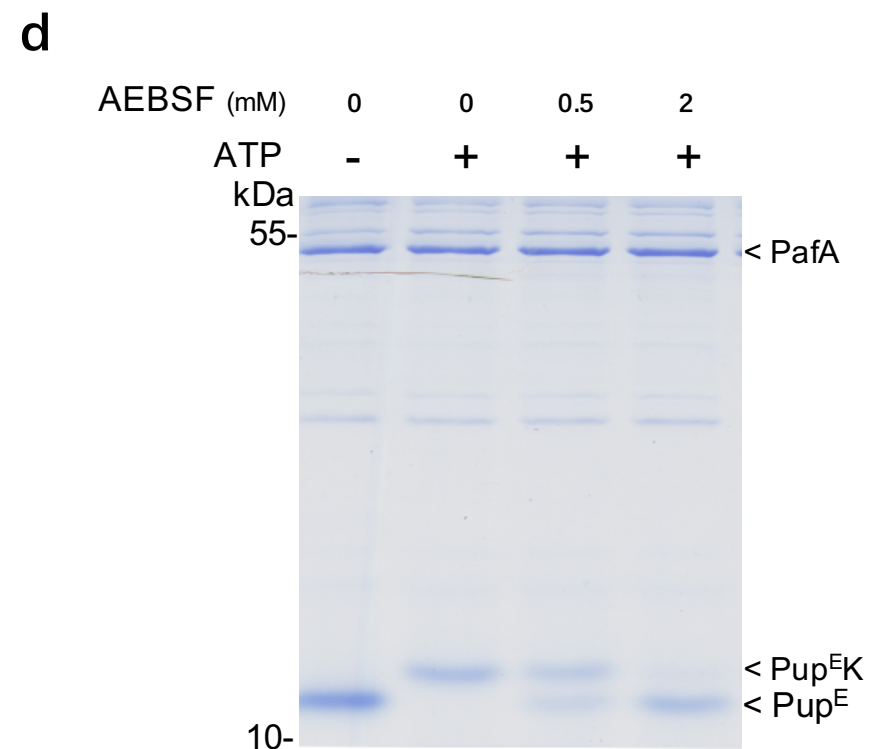

**Figure S4**

Supplement: mmc6.pdf [file mmc6.pdf]
